# Supplementary material for: Low-Cost Prototype to Automate the 3D Digitization of Pieces: An Application Example and Comparison
Source: Sensors (Basel). 2021 Apr 7;21(8):2580. doi: 10.3390/s21082580 (PMC8067622; doi:10.3390/s21082580)
Supplement: Supplementary file 1 [file sensors-21-02580-s001.pdf]

## Supplementary Materials

| General specifications                     | Spider                                                   |
|--------------------------------------------|----------------------------------------------------------|
| 3D resolution, up to                       | 0.1 mm                                                   |
| 3D point accuracy, up to                   | 0.05 mm                                                  |
| 3D accuracy over distance, up to           | 0.03% over 100 cm                                        |
| Colours                                    | 24 bpp                                                   |
| Texture resolution                         | 1.3 mp                                                   |
| Light source                               | Blue LED                                                 |
| Working distance                           | 0.17–0.35 m                                              |
| Linear field of view, HxW @ closest range  | 90 × 70 mm                                               |
| Linear field of view, HxW @ furthest range | 180 × 140 mm                                             |
| Angular field of view, HxW                 | 30 × 21°                                                 |
| Video frame rate, up to                    | 7.5 fps                                                  |
| Exposure time                              | 0.0005 s                                                 |
| Data acquisition speed, up to              | 1 mln points/sec.                                        |
| Multi-core processing                      | Yes                                                      |
| Output formats                             |                                                          |
| 3D Formats                                 | OBJ, PLY, WRL, STL, AOP, ASCII, Disney PTEX, E57, XYZRGB |
| Formats for measurements                   | CSV, DXF, XML                                            |
| Common specifications                      |                                                          |
| Weight                                     | 0.85 kg                                                  |
| Dimensions, HxDxW                          | 190 × 140 × 130 mm                                       |
| Power consumption                          | 12V, 24W                                                 |
| Interface                                  | 1 × USB 2.0, USB 3.0 compatible                          |
| Processing capacity                        | 40 mln triangles/ 1 GB RAM                               |
| Requirements                               |                                                          |
| Processor                                  | Intel I5 or I7                                           |
| Memory                                     | 18 GB                                                    |
| Video cards                                | NVIDIA, AMD or Intel                                     |
| OS                                         | Windows 7, 8, 10 – x64                                   |
| Free disk space                            | 300 MB for installation                                  |

Table S1. 3D scanner Spider Artec  
(Source: [www.artec3d.com](http://www.artec3d.com))

| Specifications          | Nikon D5100                                                                                                                                                                                                                         |
|-------------------------|-------------------------------------------------------------------------------------------------------------------------------------------------------------------------------------------------------------------------------------|
| Type                    | Single-lens reflex digital camera                                                                                                                                                                                                   |
| Lens mount              | Nikon F mount (with AF contacts)                                                                                                                                                                                                    |
| Effective angle of view | Approx. 1.5 x lens focal length (Nikon DX format)                                                                                                                                                                                   |
| Effective pixels        | 16.2 million                                                                                                                                                                                                                        |
| Image sensor            | Sensor CMOS de 23.6 x 15.6mm                                                                                                                                                                                                        |
| Total pixels            | 16.9 million                                                                                                                                                                                                                        |
| Dust-reduction system   | Image Sensor Cleaning, Airflow Control System, Image Dust Off reference data (optional Capture NX 2 software required)                                                                                                              |
| Image size (pixels)     | 4.928 x 3.264 (L); 3.696 x 2.448 (M); 2.464 x 1.632 (S)                                                                                                                                                                             |
| File format             | NEF (RAW): 14 bit, compressed<br>JPEG: JPEG-Baseline compliant with fine (approx. 1:4), normal (approx. 1:8) or basic (approx. 1:16) compression<br>NEF (RAW) + JPEG: Single photograph recorded in both NEF (RAW) and JPEG formats |
| Picture Control System  | Standard, Neutral, Vivid, Monochrome, Portrait, Landscape; selected Picture Control can be modified; storage for custom Picture Controls                                                                                            |
| Media                   | SD (Secure Digital), SDHC and SDXC memory cards                                                                                                                                                                                     |
| File system             | DCF (Design Rule for Camera File System) 2.0, DPOF (Digital Print Order Format), Exif 2.3 (Exchangeable Image File Format for Digital Still Cameras), PictBridge                                                                    |
| Viewfinder              | Eye-level pentamirror single-lens reflex viewfinder                                                                                                                                                                                 |
| Magnification           | approx. 0.78                                                                                                                                                                                                                        |
| Shutter type            | Electronically-controlled vertical-travel focal-plane shutter                                                                                                                                                                       |
| Shutter speed           | 1/4.000 to 30 s                                                                                                                                                                                                                     |
| Self-timer              | 2 s, 5 s, 10 s, 20 s; de 1 to 9 exposures                                                                                                                                                                                           |
| Metering method         | Matrix, Centre-weighted or Spot                                                                                                                                                                                                     |
| ISO sensitivity         | ISO 100 to 6400 in steps of 1/3 EV                                                                                                                                                                                                  |
| File format video       | MOV                                                                                                                                                                                                                                 |

Table S2. Nikon camera characteristics  
(Source: [www.nikon.es](http://www.nikon.es))
